# Supplementary material for: Differential Role of the T6SS in Acinetobacter baumannii Virulence
Source: PubMed Central journal article supplement (PMC4581634; doi:10.1371/journal.pone.0138265), 2015-09-24
Supplement: pone.0138265.s001.pdf [file pone.0138265.s001.pdf]

A)

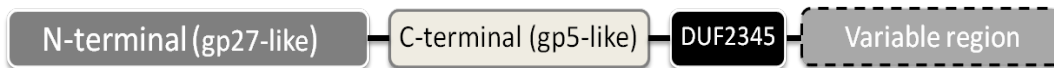

B)

```
1 60
Ab_1104 MlfnIFsVLEkIGlnaQkRAIHvQFSNelLNhQVFLQRIEGQHqLNqGLmAEELICLSTNA
DSM_1106 MlfnIFsVLEkIGlnaQkRAIHvQFSNelLNhQVFLQRIEGQHqLNqGLmAEELICLSTNA
17978_933 -----mAEELICLSTNA
Ab_1_463 MlnsThQVLDsLGIspQkRAIrvQFtspiLNdQVFLQRIIdGvHaLNdGLkAEELICLSTNA
Ab_2_601 -----
17978_1_426 -----
17978_914* --msvssiLErLGLvSQnRAVHiQFSNqSLNqQVFLQRIEGeHtLNQGsVAELICLSTNA
DSM_932 MqmsvssiLErLGLvSQnRAVHiQFSNqSLNqQVFLQRIEGeHtLNQGsVAELICLSTNA
17978_2_395 -----
DSM_875 MshkIFQiLdSLGLvaQnRvLhvQFSNASLNNQVFLQRIEGeHtLNQGsVAELICLSTNA
Ab_1064 MfnNIFQiLESfGflSQHRsVyLQFSdASLNSQVFLQRIIdGQHLYLNQGMtAEELICLSTNA
DSM_921 MfnNIsQVLESfGflSQHRsVyLQFSdASLNSQVFLQRIIdGQHLYLNQGMtAEELICLSTNA
Ab_788 MfnNIsQVLESfGflSQHRsVHLQFSdASLNSQVFLQRIEGQHLYNEGMtAEELICLSTNA
17978_921 -----myLQFSdASLNSQVFLQRIIdGQHLYLNQGMtAEELICLSTNA
```

```
61 120
Ab_1104 qIALKQFIGVQVAVDQVTDsGQlFRRTTGIvTEASyGQSDGALTLYKLTIEDaTnLWHKRR
DSM_1106 qIALKQFIGVQVAVDQVTDsGQlFRRTTGIvTEASyGQSDGALTLYKLTIEDaTnLWHKRR
17978_933 qIALKQFIGVQVAVDQVTDsGQlFRRTTGIvTEASyGQSDGALTLYKLTIEDaTnLWHKRR
Ab_1_463 tIqLKsFIGVQaAVDiVTerGeltRvTGIIThAcqGQSDGsLTLYKLTIEDPTaLWkyRR
Ab_2_601 -----
17978_1_426 -----
17978_914* HIALKQFIGcQVAVDQVTDtGQFFRRTTGIITEASQGQSDGsLTiYnLTLkDPTaLWHKRR
DSM_932 HIALKQFIGcQVAVDQVTDtGQFFRRTTGIITEASQGQSDGsLTiYnLTLkDPTaLWHKRR
17978_2_395 -----
DSM_875 HIALKQFIGcQVAiDQVTDtGQFFRRTTGIITEASQGQSDGsLTiYnLTLkDPTaLWHKRR
Ab_1064 HIpLktFIGVQVAVDQVTDsGQlFRRTTGIITgASQGQSDGALTLYKLaIsDPTyLWHKRR
DSM_921 HIpLktFIGlQVAVDQVTDsGQlFRRTTGIITgASQGQSDGALTLYKLaIsDPTyLWHKRR
Ab_788 HIALKtFIGVQVAiDQVTDGQlFRRTTGIITgASQGQSDGALTLYKLTIsDPTyLWHKRR
17978_921 HIpLktFIGlQVAVDQVTDsGQlFRRTTGIITgASQGQSDGALTLYKLaIsDPTyLWHKRR
```

```
121 180
Ab_1104 NSRVFMNKSivEItEvLFKEWQeKSPLFAaSLsLDLgGLsQnYDiRPftMQhNESDYDFL
DSM_1106 NSRVFMNKSivEItEvLFKEWQeKSPLFAaSLsLDLgGLsQnYDiRPftMQhNESDYDFL
17978_933 NSRVFMNKSivEItEvLFKEWQeKSPLFAaSLsLDLgGLsQnYDiRPftMQhNESDYDFL
Ab_1_463 NSRVFMNKSvEiEwEILFKEWQtKnPLFAaSLsLDLsGLtQTYDVRPFVmqhNESDwnFL
Ab_2_601 -----
17978_1_426 -----MQsNESDYDFL
17978_914* NSRVFMNKSvRdISeILFKEWQKsPLFAssiTLdtSGLtkdYDVRPFVmqhNESDYDFL
DSM_932 NSRVFMNKSvRdISeILFKEWQKsPLFAssiTLdtSGLtkdYDVRPFVmqhNESDYDFL
17978_2_395 -----
DSM_875 NSRVFMNKSvRdInEILFKEWQKsPLFAssiTLdtSGLskdYDVRPFVmqhNESDYDFL
Ab_1064 NSRVFMNKSvKEISeILFqEWQKsPLFAssiTLdLSGLKQTYDVRPFVmqhNESDYDFL
DSM_921 NSRVFMNKSvKEISeILFqEWQKsPLFAssiTLdLSGLKQTYDVRPFVmqhNESDYDFL
Ab_788 NSRVFMNKSvREIteILFqEWQKsPLFAssiTLdLSGLKQaYDiRPFVmqhNESDYDFL
17978_921 NSRVFMNKSvKEISeILFqEWQKsPLFAssiTLdLSGLKQTYDVRPFVmqhNESDYDFL
```

```
181 240
Ab_1104 TRLWRSEGvSWLIDeSELFVphfTApIQaQKLRLIDDNNQYQALARRSIRYHRSSATEYq
DSM_1106 TRLWRSEGvSWLIDeSELFVphfTApIQaQKLRLIDDNNQYQALARRSIRYHRSSATEYq
17978_933 TRLWRSEGvSWLIDeSELFVphfTApIQgQKLRLIDDNNQYQALARRSIRYHRSSATEYq
Ab_1_463 TRLlRSEnISWLIDeaqhiVpStdtsIQaQKLRLIDaNsQYQpLdRktIRYHRSSAvEQY
Ab_2_601 -----
17978_1_426 TRLWRSEGINWlvDESqLFVAdpnASIQPQvLRLIDDnqnYQALeRRSIRYqRSSATEQF
17978_914* TRLWRSEGINWlvDESqLFVAdpnASIQPQvLRFnrpkfirhlnAvaSaitvsSatravp
DSM_932 TRLWRSEGINWlvDESqLFVAdpnASIQPQvLRLIDDnqnYQALeRRSIRYqRSSATEQF
17978_2_395 -----
DSM_875 TRLWRSEGINWlvDESqLFVAdpnASIQPQvLRLIDDnqnYQALeRRSIRYqRSSATEQF
Ab_1064 TRLWRSEGISWLIDeaELtVAsnmdNIQPQKLRLIDDNNQYQALtRRaIRYHRSSATEQF
```

DSM\_921 TRLWRSEGISWLIIDaELtVAsnmdNIQPQKLRLIDDNNQYQALtRRaIRYHRSSATEQF  
Ab\_788 TRLWRSEGINWLIIDaELtVpSnTdhIQPQKLRLIDDNsQYQALSRRtIRYHRShATEQF  
17978\_921 TRLWRSEGISWLIIDaELtVAsnTdnIQPQKLRLIDDNsQYQtLlRRtIRYHRSSATEQF

241 300  
Ab\_1104 DSIITgfvAvRSLQPTaVHVQRWQpDALaQEEGNGSVvtThtHSDNfDsAtLSLEqAWHVS  
DSM\_1106 DSIITgfvAvRSLQPTaVHVQRWQpDALaQEEGNGSVvtThtHSDNfDsAtLSLEqAWHVS  
17978\_933 DSIITgfvAvRSLQPTaVHVQRWQpDALaQEEGNGSVvtThtHSDNfDsAtLSLEqAWHVS  
Ab\_1\_463 DSmTRLtAeRSLQPNvmHiQRWQaeiLQEEGiGSVQSkHqHSEhYDNAtLgLEqAWnyS  
Ab\_2\_601 -----  
17978\_1\_426 DtITQvKAeRrLQPTSvHVQRWQADALQEEGSGSVQgTqKHSEhYDNASLnLEDAWHVS  
17978\_914\* irITQvKAeRrLQPTSvHVQRWQADALQEEGSGSVQgTqKHSEhYDNASLnLEDAWHVS  
DSM\_932 DtITQvKAeRrLQPTSvHVQRWQADALQEEGSGSVQgTqKHSEhYDNASLnLEDAWHVS  
17978\_2\_395 -----  
DSM\_875 DtITQvKAeRrLQPTSvHVQRWQADALQEEGSGSVQgTqKHSEhYDNASLnLEDAWHVS  
Ab\_1064 DSmTslmAdRSLQPTSifVQRWQpDvLQQtDgAGSVQSkHqHStNYDNqSLSLEaAWHfS  
DSM\_921 DSmTslmAdRSLQPTSifVQRWQpDvLQQtDgAGSVQSkHqHStNYDNqSLSLEaAWHfS  
Ab\_788 DSmTslmAnRSLQPTSVfVQRWQsDvLQQtDgAGSVQStHqHStNYDNqSLSLEDAWHfS  
17978\_921 DSmTslLiAgRhLQPsSVfVQRWQsDvLQQtDgAGSVQSkHeHSsNYDNqSLnLEDAWHfS

301 360  
Ab\_1104 PAWMQDLkGEDQATASSsSQLEKLNQHftdmHaSraKyFkAyssVRDTQVGWYFnlrEHP  
DSM\_1106 PAWMQDLkGEDQATASSsSQLEKLNQHftdmHaSraKyFkAyssVRDTQVGWYFnlrEHP  
17978\_933 PAWMQDLkGEDQATASSsSQLEKLNQHftdmHaSraKyFkAyssVRDTQVGWYFnlrEHP  
Ab\_1\_463 PAWigDLkGEDgvtKsNgQvErLNQnLhnYyEAQaKrFiaqTTVRDayVGYyFELNEHP  
Ab\_2\_601 -----  
17978\_1\_426 PAWMQDLNGkDQATASgNSQieqLNQHINAYHhlsSKQftvagnVRDaQVGWYFELNdHP  
17978\_914\* PAWMQDLNGEDQATASgNSQieqLNQHINAYHhlsSKQftvagnVRDaQVGWYFELNdHP  
DSM\_932 PAWMQDLNGEDQATASgNSQieqLNQHINAYHhlsSKQftvagnVRDaQVGWYFELNdHP  
17978\_2\_395 -----  
DSM\_875 PAWMQDLNGEDQATASgNSQieqLNQHINAYHhlsSKQftvagnVRDaQVGWYFELNdHP  
Ab\_1064 PAWMQDLNGEDgATsaSNqQieKfNqNlSAYyDAQSKQfiAkTTVRDTQVGWYFELNEHP  
DSM\_921 PAWMQDLNGEDgATsaSNqQieKfNqNlSAYyDAQSKQfiAkTTVRDTQVGWYFELNEHP  
Ab\_788 PAWMQDLkGEDgATsaSNqQieKfNqNlSafHDAQSKQfiAqTTVRDTQVGWYFELNEHP  
17978\_921 PAWMQDLNGEDgATsaSNqQieKfNqNlSAYHDAQSKQfvAqTTVRDTQVGWYFELNEHP

361 420  
Ab\_1104 EIDQHEGADqEFLIIaKnfYNQNNLPKDLhQQVsQLLTQ-----SrWdqhgycDI-ERQG  
DSM\_1106 EIDQHEGADqEFLIIaKnfYNQNNLPKDLhQQVsQLLTQ-----SrWdqhgycDI-ERQs  
17978\_933 EIDQHEGADqEFLIIaKnfYNQNNLPKDLhQQVsQLLTQ-----SrWdqhgycDI-ERQG  
Ab\_1\_463 EIDQHEssDKsFLIVSKnffNQNLPKDLndQIngLLaQ-----SnWaiQNPensdERQa  
Ab\_2\_601 -----  
17978\_1\_426 ELDQHdsADKEFLIISKHYNNQNNLPKeLQQQlERLLpQGKlKaQlDSQNPe---qRhf  
17978\_914\* ELDQHdsADKEFLIISKHYNNQNNLPKeLQQQlERLLpQGKlKaQlDSQNPe---qRhf  
DSM\_932 ELDQHdsADKEFLIISKHYNNQNNLPKeLQQQlERLLpQGKlKaQlDSQNPe---qRhf  
17978\_2\_395 -----  
DSM\_875 ELDQHdsADKEFLIISKHYNNQNNLPKeLQQQlERLLpQGKlKaQlDSQNPe---qRhf  
Ab\_1064 EIDQHestDKEFLIIgKnYYNNQNNLPKDLnQQIQnLvqQ-----SdWqasNtd---ERQa  
DSM\_921 EIDlHsGADKEFLIIgKsYYNNQNNLPKDLdQQIQtLtTQ-----ShWqSshtk---ERQG  
Ab\_788 EIDQHnGsDKEFLIIgKHYNNQNNLPKDLnQQIQaLvRQ-----ShW-SiNnE---ERQG  
17978\_921 EIDlHsGADKEFLIIgKHYNNQNNLPKDLdQQIQtLtTQ-----ShWqSshtk---ERQG

421 480  
Ab\_1104 NELtLiRRqIKTaPEYNPeQHRPiAyPQRAkVVGPEGEtIHVDeWGRIKVRFLFTRSDDH  
DSM\_1106 NELtLiRRqIKTaPEYNPeQHRPiAyPQRAkVVGPEGEtIHVDeWGRIKVRFLFTRSDDH  
17978\_933 NELtLiRRqIKTaPEYNPeQHRPiAyPQRAkVVGPEGEtIHVDeWGRIKVRFLFTRSDDH  
Ab\_1\_463 NqLiLqRRHIpTtPaYNPqiHsPvtHPQRAkVVGPEGEIyVDeWGay-----  
Ab\_2\_601 -----msGGRIKVRFLFTRSDDH  
17978\_1\_426 aELnvvrRnIKaVPEYNPlEHRPaAHPQARVVGLEGESIHVDQWGRIVRFLFTRSDDH  
17978\_914\* c--aecRsshqscaillirstdqPltHsa-pRVVGLGESIHVDpvGR-hsRFLFTRaDDH  
DSM\_932 aELnvvrRnIKaVPEYNPlEHRPaAHPQARVVGLEGESIHVDQWGRIVRFLFTRSDDH  
17978\_2\_395 -----  
DSM\_875 aELnvvrRnIKaVPEYNPlEHRPaAHPQARVVGLEGESIHVDQWGRIVRFLFTRaDDH  
Ab\_1064 NqLiLqRRHIpTtPaYNPqiHsPvtHPQRAkVVGPEGEIyVDeWGRIKVRFLFTRSDDH  
DSM\_921 NqLiLqRRHIKTVPEYqPlQdRPqAsvQARVVGPEGESIHVDQWGRIVRFLFTRSDDH  
Ab\_788 NELtLiLqRRHIKTVPEYqPlQdRPqAsvQARVVGPEGESIHVDQWGRIVRFLFTRaDDH  
17978\_921 NqLiLqRRHIKTVPEYqPlQdRPqAsvQARVVGPEGESIyVDQWGRIVRFLFTRanDH

481 540  
Ab\_1104 gHDGGAGSNDNDTDSAWVDVLTWPAGEGYGARFLPRIGEvvVidFFDGNIDRPFVtGRIH  
DSM\_1106 gHDGGAGSNDNDTDSAWVDVLTWPAGEGYGARFLPRIGEvvVidFFDGNIDRPFVtGRIH

17978\_933 gHDGGAGSNDNDTDSAWVDVLTWPAGEGYGARFLPRIGEIVVIDFFDGNIDRPFVtGRIH  
Ab\_1\_463 -----  
Ab\_2\_601 SHDGGAGtNnNDTDSAWiDVLTPWAGEGYGARFLPRIGEIVVIDFFnGdIDRPFVmGRIH  
17978\_1\_426 -----LPElmttammvelevttmtPtrlGsmY  
17978\_914\* SHDGGAGSNDNDTDSAWVDVLTWPAGaGYGARFLPRvGEIVVIDFFDGNIDRPFVVGRIH  
DSM\_932 SHDGGAGSNDNDTDSAWVDVLTWPAGaGYGARFLPRvGEIVVIDFFDGNIDRPFVVGRIH  
17978\_2\_395 -----mVGRIH  
DSM\_875 SHDGGAGSNDNDTDSAWVDVLTWPAGaGYGARFLPRvGEIVVIDFFDGNIDRPFVVGRIH  
Ab\_1064 SHDGGAGtNnNDTDSAWVDVLTWPAGEGYGARFLPRIGEIVVIDFFnGdIDRPFVmGRIH  
DSM\_921 SHDGGAGSNDNDTDSAWVDVvTPWAGkGYGARFLPRvGEIVVIDFFDGNIDRPFVVGRIH  
Ab\_788 rHDGGAGSNDNDTDSAWVDVLTWPAGEGYGARFLPRIGEIVVIDFFDGNvDRPFVVGRIH  
17978\_921 SHDGGAGSNDNDTDSAWVDVLTWPAGaGYGARFLPRvGEIVVIDFFDGNIDRPFVVGRIH

541 600  
Ab\_1104 EAqRsPTkFDvKQQLPDTKKLSGIRSqEinGsGFNQLRFDDTTGQIStQLQSSHAAtQLN  
DSM\_1106 EAqRsPTkFDvKQQLPaTKKLSGIRSqEinGsGFNQLRFDDTTGQIStQLQSSHAAtQLN  
17978\_933 EAqRsPTkFDvKQQLPDTKKLSGIRSqEinGsGFNQLRFDDTTGQIStQLQSSHAAtQLN  
Ab\_1\_463 -----  
Ab\_2\_601 EAqRqPTkFDnKgkLPDTKKLSGIRSkEVsGgGFgQLRFDDTpGQIStQLQSSHgASQLN  
17978\_1\_426 s-----llgqGQv-----mahvschvlvkLlSSislvtm1  
17978\_914\* EAERHPTQFDQKQQLPDTKKLSGIRSEEVdGKGFNQLRFDDTTGQISaQLQSSHAASQLN  
DSM\_932 EAERHPTQFDQKQQLPDTKKLSGIRSEEVdGKGFNQLRFDDTTGQISaQLQSSHAASQLN  
17978\_2\_395 EAERqPTQFDQKQQLPDTKKLSGIRSEEVdGKGFNQLRFDDTTGQISaQLQSSHAASQLN  
DSM\_875 EAERHPTQFDQKQQLPDTKKLSGIRSEEVdGKGFNQLRFDDTTGQISaQLQSSHAASQLN  
Ab\_1064 EAQRHPTkFDnKgkLPDTKKLSGIRSkEVsGgGFgQLRFDDTpGQIStQLQSSHgASQLN  
DSM\_921 EAERHPaQFDQKQQLPDTKKLSGIRSEEVdGKGFNQLRFDDTTGQISaQLhSSHAASQLN  
Ab\_788 EAERHPTQFDQKQQLPDTKKLSGIRSEEVdGKGFNQLRFDDTTGQISaQLQSSHAASQLN  
17978\_921 EAERHPaQFDQKQQLPDTKKLSGIRSEEVdGKGFNQLRFDDTTGQISaQLQSSHAvSQLN

601 660  
Ab\_1104 LGNLSHPKkEqAtSqGRGEGFELRTDaWGA-VRAGKGMlISTyaQeQAiadHLeAAQAqsl  
DSM\_1106 LGNLSHPKkEqemSqGRGEGFELRTDaWGA-VRAGKGMlISTyaQeQAiadHLeAAQAqsl  
17978\_933 LGNLSHPKkEqetSqGRGEGFELRTDaWGA-VRAGKGMlISTyaQeQAiadHLeAAQAqsl  
Ab\_1\_463 -----  
Ab\_2\_601 LGkLshPKDKAESedRGEGFELRTDQWGA-1RAGqGLLVSTHKQDnAKGdHLDAevAKkQ  
17978\_1\_426 tarLw-----WGvfmkpsanqrsSTRkasy1tprnLavSvqKks  
17978\_914\* LGNLSHPKDKAESDGRGEGFELRTDQWGA-VRAGsGLLVSTHKQDQAQgVHLDASEAQQ  
DSM\_932 LGNLSHPKDKAESDGRGEGFELRTDQWGA-VRAGsGLLVSTHKQDQAQgVHLDASEAQQ  
17978\_2\_395 LGNLSHPKDKAESDGRGEGFELRTDQWGA-VRAGsGLLIStHKQDQAQgVHLDASEAQQ  
DSM\_875 LGNLSHPKDKAESDGRGEGFELRTDQWGA-VRAGsGLLVSTHKQDQAQgVHLDASEAQQ  
Ab\_1064 LGkLshPKDKAESedRGEGFELRTDQWGA-1RAGqGLLVSTHKQDnAKGdHLDAgvAKkQ  
DSM\_921 LGNLSHPKDKAESDGRGEGFELRTDQWGA-VRAGKGLLVSTHKQDQAQgVHLDAAnnAeQQ  
Ab\_788 LGNLSHPKkEAESDGRGEGFELRTDQWGA-VRAGsGLyVSTHKQDQAQgTHLDAkEtKQQ  
17978\_921 LGNLSHPKDKAESDGRGEGFELRTDQWGA-VRAGKGLLVSTHKQDQAQgTHLDAADAKQQ

661 720  
Ab\_1104 lsqGyesmKmLSEVAakQQTDaLNVINRLPKFIQSLELKTtGQALNSTVNLFKEGINNDP  
DSM\_1106 lsqGyesmKmLSEVAakQQTDaLNVINRLPKFIQSLELKTtGQALNSTVNLFKEGINNDP  
17978\_933 lsqGyesmKmLSEVAakQQTDaLNVINRLPKFIQSLELKTtGQALNSTVNLFKEGINNDP  
Ab\_1\_463 -----  
Ab\_2\_601 lEGsqtNsKALSdiAKNqkTDei-----  
17978\_1\_426 makaLtss-----  
17978\_914\* IEGGLNNAKALSEVAKNQQTDPi-----  
DSM\_932 IEGGLNNAKALSEVAKNQQTDPi-----  
17978\_2\_395 IEGGLNNAKALSEVAKNQQTDPi-----  
DSM\_875 IEGGLNNAKALSEVAKNQQTDPi-----  
Ab\_1064 IEGsqtNsKALSdiAKNqkTDei-----  
DSM\_921 IEGsLNNAKALSEVAKNQQTDPi-----  
Ab\_788 ldGnLNNAKALSdVAKNQQTDPi-----  
17978\_921 IEGGLNNAKALSEVAKNQQTDPi-----

721 780  
Ab\_1104 IHALKDCGGFIQDIGALGGNAKGVVDEFNSFFSDAKdavENLKaFIEEnVEEHgPDIvKGG  
DSM\_1106 IHALKDCGGFIQDIGALGGNAKGVVDEFNSFFSDAKdavENLKaFIEEnVEEHgPDIvKGG  
17978\_933 IHALKDCGGFIQDIGALGGNAKGVVDEFNSFFSDAKdavENLKaFIEEnVEEHgPDIvKGG  
Ab\_1\_463 -----  
Ab\_2\_601 -----EsiEqLkdfasQIqq-----  
17978\_1\_426 -----  
17978\_914\* -----EMLENLkTFIEQIEEkDqD-----  
DSM\_932 -----EMLENLkTFIEQIEEkDqD-----  
17978\_2\_395 -----dMLENIqTFLEv1kqeDPk-----

DSM\_875 -----dMLENIqTFLEvIkqeDPk-----  
Ab\_1064 -----EsiEqLKdFasQIqq-----  
DSM\_921 -----EVLENLKnFLEQIEqqDkD-----  
Ab\_788 -----EhLENLKTFFLEQIEEQDqg-----  
17978\_921 -----EMLENLKTFFIEQIEEKDqD-----

781 840  
Ab\_1104 LASIKDRIHKNPFFESIQEVGrVLANVETKDFDLMSmTCGTFSKSGSKLEVSPSKALSSSLQGF  
DSM\_1106 LASIKDRIHKNPFFESIQEVGKVLANVETKDFDLMSmTCGTFSKSGSKLEVSPSKALSSSLQGF  
17978\_933 LASIKDRIHKNPFFESIQEVGKVLANVETKDFDLMSmTCGTFSKSGSKLEVSPSKALSSSLQGF  
Ab\_1\_463 -----  
Ab\_2\_601 -----  
17978\_1\_426 -----  
17978\_914\* -----  
DSM\_932 -----  
17978\_2\_395 -----  
DSM\_875 -----  
Ab\_1064 -----  
DSM\_921 -----  
Ab\_788 -----  
17978\_921 -----

841 900  
Ab\_1104 MEGYTQGLESSSDTKQQEgqgkiFrQALMLLASPNgIALttpEnIiLqAsqdiaeSAsgSI  
DSM\_1106 MEGYTQGLESSSDTKQQEgqgkiFrQALMLLASPNgIALttpEnIiLqAsqdiaeSAsgSI  
17978\_933 MEGYTQGLESSSDTKQQEgqgkiFrQALMLLASPNgIALttpEnIiLqAsqdiaeSAsgSI  
Ab\_1\_463 -----  
Ab\_2\_601 -----qiAkFekALiLLsSPdgIALsSsEDIHiSADaQinQiAGDSI  
17978\_1\_426 -----vLmtPqaksvpSy-----  
17978\_914\* -----KAAaFKQALMiLtaPNSIALASNEDIHLSADGQLNQtAGDSI  
DSM\_932 -----KAAaFKQALMiLtaPNSIALASNEDIHLSADGQLNQtAGDSI  
17978\_2\_395 -----KAAeFqsAvMLLASPkSIavsSNEDIHLSAnGQLtQSAGDSI  
DSM\_875 -----KAAeFqsAvMLLASPkSIavsSNEDIHLSAnGQLtQSAGDSI  
Ab\_1064 -----qiAkFekALiLLsSPdgIALsSsEDIHiSADaQinQiAGDSI  
DSM\_921 -----KAAvFKQAIvLsaPNSVAIASNEDIHLSADGQLsQSAGDSI  
Ab\_788 -----KAAaFKQALMvLtaPNSIALASNEDIHLSADGQLsQtAGDSI  
17978\_921 -----KAAaFKQALMvLtaPNSIAvASNEDIHLSADGQLsQnAGDSI

901 960  
Ab\_1104 NLSaQKNIIGHAQdKISLFAAQkGlsafAAKGPikvQAQteGieIlsRKnIkILSvEDKI  
DSM\_1106 NLSaQKNIIGHAQdKISLFAAQkGlsafAAKGPikvQAQteGieIlsRKnIkILSvEDKI  
17978\_933 NLSaQKNIIGHAQdKISLFAAQkGlsafAAKGPikvQAQteGieIlsRKnIkILSvEDKI  
Ab\_1\_463 -----  
Ab\_2\_601 NiSTQKNVIAHAQNrlSLFAAQsGlkavAAqGKVEIQAQsDalDvlnKGIItIsSTEDcI  
17978\_1\_426 -----KvampqAs-----  
17978\_914\* NLSTQKNIIAHAQNKISLFAAQGGARLYAgKGVKVEIQAGGDGADLIARKavQvISTEDKI  
DSM\_932 NLSTQKNIIAHAQNKISLFAAQGGARLYAgKGVKVEIQAGGDGADLIARKavQvISTEDKI  
17978\_2\_395 NmSTQKNIVnHAsqKISLFAAQEGARLFAgKGVKVEIQAGGDGLDvIARKGIQItSTEDtv  
DSM\_875 NmSTQKNIVnHAsqKISLFAAQEGARLFAgKGVKVEIQAGGDGLDvIARKGIQItSTEDtv  
Ab\_1064 NiSTQKNVIAHAQNrlSLFAAQsGlkavAAqGKVEIQAQaDalDvlsklGIItIsSTdDKv  
DSM\_921 NLSTQKNIIAHAQNKISLFAAQGGARLYAgnKGVKVEIQAGGDGADLIARKGvQIISTEDRI  
Ab\_788 sLSTQKNIIAHAQNKISLFAAQEGARLYAAKGLIEvQAQGe-----  
17978\_921 sLSTQKNIIAHAQNKISLFAAQGGARLYAgKGVKVEIQAGGDGADLIARKGIQIISTEDKI

961 1020  
Ab\_1104 EIVgqKEIVLnAGGSQltIsdkGvFinTprlFhaKAGQHkFdaGaiINysfPnLPs----  
DSM\_1106 ELTSPKEIVLTAGGSQlKINanGvFstTGGKFEsKAGQHlFtsGatVnaelPkMpe---t  
17978\_933 ELTSPKEIVLTAGGSQlKINanGvF-----  
Ab\_1\_463 -----  
Ab\_2\_601 EISsPKEIViTgasSQItlNGSGIFPkTGGKFEqVnAGQHvFqGGASasvqsslPp-pKkr  
17978\_1\_426 -----  
17978\_914\* EaTaaKEIVLTAGGSQVKItGSGIFmtTsGKFEVKAGQHlFMGGgSVNsslPylPe-ggk  
DSM\_932 EaTaaKEIVLTAGGSQVKItGSGIFmtTsGKFEVKAGQHlFMGGgSVNsslPylPe--ae  
17978\_2\_395 fITSPtEInLTAnGSQVKlNGSGIFFPVTGGKlEVKAGQHlFMGGeqVt-----pKkqEn  
DSM\_875 yITSPtEInLTAnGSQVKlNGSGIFFPVTGGKlEVKAGQHlFMGGsSINppaldLP-----  
Ab\_1064 iISsPKEvkiTgGsSQItlNGSGIFPkTGGKFEqVnAGQHlFmaGASaPelaPkaKp  
DSM\_921 EITasKEvViTsGGSQIKINsSGIFFPVTGGKFEVKAGQHlFtsGASvSantPqLPvlgeEl  
Ab\_788 -----KslIvsf-----QrLykG-----  
17978\_921 EInasKEIViTsGGSQIKINsSGIFFPVTGGKFEVKAGQHvFMGGakadyvlPsLPt-qEi

Ab\_1104 -myygnFnitDknnnpig-GqKYkmtlp-sGKeilGftDeNGntvtgysgednqnLk1Ei  
DSM\_1106 gmysMrEdlsqifdtkilknmEYklinhskkieavvefegessARVysdsvdnveLal--  
17978\_933 -----  
Ab\_1\_463 -----  
Ab\_2\_601 vqgvLelfheyahGefvK-GgsYrVvdn-fGKevtGkLDdkGfAKVsglatGavKvfFEs  
17978\_1\_426 -----  
17978\_914\* qkygvwFdvmDkqGnklKpGtEYiIFdehdKierGkLDrtGlvKL-----  
DSM\_932 npfvLqYlvkNkenqvms-ekpYilldd-eGnihrGttDkdGfmKL-----  
17978\_2\_395 kpcyLlFeitDldGkpaK-nvEYiaFrm-dGsrqkGqtnaqGltQr-----  
DSM\_875 -----dcsakqtqaaqNGsAKVdls-----  
Ab\_1064 mpgaLellrsyggdnfFK-qnsYkVids-lGKqitGkLDgNGfAQVtgiapGpAKvvFEk  
DSM\_921 nqhnLrYllkDkeGipEa-hhKYiaFmp-nGKkleGitDeNGytQL-----  
Ab\_788 -----  
17978\_921 ktddLlleylhsdGtpvK-GaDYevlls-dGsirkGkLDasGkAivsgvpaGrAKiqYge

1081 1140  
Ab\_1104 -----iedlyqdiwqpnstyEyet  
DSM\_1106 -----vpgvylteikeliseqEaes  
17978\_933 -----dnrw-----  
Ab\_1\_463 -----  
Ab\_2\_601 DhrdpWdtASDFKRpveWpnkndAdseqsdsLlTaqMSKtaqsklgelskqltnptnimkn  
17978\_1\_426 -----  
17978\_914\* -----eteepnkqyKihv-----  
DSM\_932 -----kttasqrittrvmmnEieq-----  
17978\_2\_395 -----fetdgseqisihicdenask-----  
DSM\_875 -----  
Ab\_1064 DntsawllqSSDFKRnytWaepvkSvqglmkNaLeaVgqntmsqlqnnllstdknsfKnlg  
DSM\_921 -----iktvrpeeisihlynnEein-----  
Ab\_788 -----  
17978\_921 Dq-----SKdefpalevddwftqlgsstktg

1141 1200  
Ab\_1104 iddlElpvnfdkEvdEde-----  
DSM\_1106 lddeDidscgcgEehEhd-----  
17978\_933 -----  
Ab\_1\_463 -----  
Ab\_2\_601 iqtaqsiksegakalmpmLktqAqglVtdQVksfLpisEagqkignSielTsiqKMndfn  
17978\_1\_426 -----  
17978\_914\* vn-----  
DSM\_932 aDeeEagtee-----  
17978\_2\_395 yklaakg-----  
DSM\_875 -----  
Ab\_1064 kntlDnlagqtvaqiknqVtntAlntVSkQLnlLnLsadmkslgqmAtnpSqsLEMLkeq  
DSM\_921 id-----  
Ab\_788 -----  
17978\_921 kEe-----

1201  
Ab\_1104 -----  
DSM\_1106 -----  
17978\_933 -----  
Ab\_1\_463 -----  
Ab\_2\_601 ksgsIdgnslnvnnllhqylqSPfKKns-----  
17978\_1\_426 -----  
17978\_914\* -----  
DSM\_932 -----  
17978\_2\_395 -----  
DSM\_875 -----  
Ab\_1064 ggdfLsdqmtaklSkstnqdSPiQQgAldtfvrskk  
DSM\_921 -----  
Ab\_788 -----  
17978\_921 -----

**S1 Fig.**
