# Supplementary material for: Differential Role of the T6SS in Acinetobacter baumannii Virulence
Source: PubMed Central journal article supplement (PMC4581634; doi:10.1371/journal.pone.0138265), 2015-09-24
Supplement: pone.0138265.s006.pdf [file pone.0138265.s006.pdf]

**S1 Table. Strains and plasmids included in this study.**

| Designation                         | Relevant characteristics                                                                                                                                                   | Reference or source |
|-------------------------------------|----------------------------------------------------------------------------------------------------------------------------------------------------------------------------|---------------------|
| <b>Strains</b>                      |                                                                                                                                                                            |                     |
| <i>A baumannii</i>                  |                                                                                                                                                                            |                     |
| ATCC17978                           | Reference strain                                                                                                                                                           | ATCC                |
| 17978 $\Delta tssM$                 | ATCC17978 isogenic derivative <i>tssM</i> unmarked deletion mutant                                                                                                         | This study          |
| 17978 mini-CTX1                     | ATCC17978 carrying a chromosomal insertion of mini-CTX1 conferring tetracycline resistance.                                                                                | This study          |
| DSM30011                            |                                                                                                                                                                            | ATCC                |
| DSM30011 $\Delta tssM$              | DSM30011 isogenic derivative <i>tssM</i> deletion mutant, marked with an apramycin resistance cassette                                                                     | This study          |
| DSM30011 $\Delta tssM$ <i>ptssM</i> | DSM30011 $\Delta tssM$ complemented strain                                                                                                                                 | This study          |
| DSM30011 mini-Tn7                   | DSM30011 carrying a chromosomal insertion of mini Tn7 conferring gentamycin resistance.                                                                                    | This study          |
| Ab242                               | Clinical isolate                                                                                                                                                           | [1]                 |
| Ab244                               | Clinical isolate                                                                                                                                                           | [1]                 |
| Ab825                               | Clinical isolate                                                                                                                                                           | [1]                 |
| <i>E. coli</i>                      |                                                                                                                                                                            |                     |
| DH5 $\alpha$                        | intermediate host for cloning and nalidixic acid resistant prey in bacterial competition assays. In some cases this strain contained a plasmid carrying apramycin cassette | [2]                 |
| <i>P. aeruginosa</i>                |                                                                                                                                                                            |                     |
| PAK                                 | prey in the bacterial competition assays.                                                                                                                                  | [3]                 |
| PAK <i>retS</i>                     | <i>retS</i> mutant used as prey in the bacterial competition assays                                                                                                        | [3]                 |
| PA14                                | prey in the bacterial competition assays and positive control in cell death experiments                                                                                    |                     |
| PA7                                 | prey in the bacterial competition assays                                                                                                                                   | [4]                 |
| <i>K. pneumoniae</i>                |                                                                                                                                                                            |                     |
| 52145                               | prey in the bacterial competition assays                                                                                                                                   | [5]                 |
| <b>Plasmids</b>                     |                                                                                                                                                                            |                     |
| pGEM <sup>®</sup> -T Easy           |                                                                                                                                                                            | Promega             |
| pGEM-2.1                            | pGEM <sup>®</sup> -T Easy derivative carrying 2 kb upstream and downstream regions of DSM30011 <i>tssM</i> gene                                                            | This study          |
| pGEM-2.2                            | pGEMT-2.1 derivative with DSM30011 <i>tssM</i> gene flanking regions interrupted by an apramycin resistant cassette                                                        | This study          |
| pEX100T/Kan                         | pEX100T derivative carrying a kanamycin resistant cassette                                                                                                                 | [6]                 |
| pEX-TssM17                          | pEX100T/Kan derivative carrying 0.5 kb upstream and downstream regions of 17978 <i>tssM</i> gene                                                                           | This study          |
| pX5K                                | derivative of the RSF1010-derived plasmid pMM2017-Kan14                                                                                                                    | [7]                 |
| pTssM                               | pX5K derivative carrying DSM30011 <i>tssM</i> gene under the control of a constitutive promoter                                                                            | This study          |

|            |                                                                                            |     |
|------------|--------------------------------------------------------------------------------------------|-----|
| pMini Tn7  | Used to insert gentamycin resistance into the chromosome for bacterial competition assays  | [8] |
| pMini CTX1 | Used to insert tetracyclin resistance into the chromosome for bacterial competition assays | [9] |

1. Mussi MA, Limansky AS, Viale AM (2005) Acquisition of resistance to carbapenems in multidrug-resistant clinical strains of *Acinetobacter baumannii*: natural insertional inactivation of a gene encoding a member of a novel family of beta-barrel outer membrane proteins. *Antimicrob Agents Chemother* 49: 1432–1440. doi:10.1128/AAC.49.4.1432-1440.2005.
2. Hanahan D (1983) Studies on transformation of *Escherichia coli* with plasmids. *J Mol Biol* 166: 557–580.
3. Moscoso JA, Mikkelsen H, Heeb S, Williams P, Filloux A (2011) The *Pseudomonas aeruginosa* sensor RetS switches type III and type VI secretion via c-di-GMP signalling. *Environ Microbiol* 13: 3128–3138. doi:10.1111/j.1462-2920.2011.02595.x.
4. Cadoret F, Ball G, Douzi B, Voulhoux R (2014) Txc, a new type II secretion system of *Pseudomonas aeruginosa* strain PA7, is regulated by the TtsS/TtsR two-component system and directs specific secretion of the CbpE chitin-binding protein. *J Bacteriol* 196: 2376–2386. doi:10.1128/JB.01563-14.
5. March C, Moranta D, Regueiro V, Llobet E, Tomás A, et al. (2011) *Klebsiella pneumoniae* outer membrane protein A is required to prevent the activation of airway epithelial cells. *Journal of Biological Chemistry* 286: 9956–9967. doi:10.1074/jbc.M110.181008.
6. Schweizer HP, Hoang TT (1995) An improved system for gene replacement and xyle fusion analysis in *Pseudomonas aeruginosa*. *Gene* 158: 15–22.
7. Segal G, Shuman HA (1998) Intracellular multiplication and human macrophage killing by *Legionella pneumophila* are inhibited by conjugal components of IncQ plasmid RSF1010. *Mol Microbiol* 30: 197–208.
8. Choi K-H, Schweizer HP (2006) mini-Tn7 insertion in bacteria with single attTn7 sites: example *Pseudomonas aeruginosa*. *Nature Protocols* 1: 153–161. doi:10.1038/nprot.2006.24.
9. Hoang TT, Karkhoff-Schweizer RR, Kutchma AJ, Schweizer HP (1998) A broad-host-range FLP-FRT recombination system for site-specific excision of chromosomally-located DNA sequences: application for isolation of unmarked *Pseudomonas aeruginosa* mutants. *Gene* 212: 77–86.
