# Supplementary material for: Differential Role of the T6SS in Acinetobacter baumannii Virulence
Source: PubMed Central journal article supplement (PMC4581634; doi:10.1371/journal.pone.0138265), 2015-09-24
Supplement: pone.0138265.s007.pdf [file pone.0138265.s007.pdf]

**S2 Table. Primers used in this study**

| Name    | Sequence (5' to 3')                                         | Restriction site |
|---------|-------------------------------------------------------------|------------------|
| 17UpF   | CTGTTATCCCTACCCGGGGCATTTCCTGAACATATCG                       | SmaI             |
| 17UpR   | GCTCTTTACGCTGTGCACTATCCTCATATAGTGCTGCGTTCC                  | -                |
| 17DoF   | GATAGTGCACAGCGTAAAGAGC                                      | -                |
| 17DoR   | TAACAGGGTAATCCCGGGCATGTTCTTGTGGATTTGC                       | SmaI             |
| 17ChUp  | GGATGGTCAAAGATTATATTCC                                      | -                |
| 17ChDo  | CACATTCACGTTCAAGATAAAACC                                    | -                |
| DSMUpF  | CGATACCCGGGGTTGAGTTGTATTTTAAGC                              | SmaI             |
| DSMUpR  | CTGGATATCGAGTTTTGGCAGGATCAGCTGCCCTATTCTCGTTC<br>TAAGTTCAAAG | EcoRV            |
| DSMDoF  | GGCAGCTGCTCCTGCCAAAACCTGGATATCCAGTTTCTGC                    | EcoRV            |
| DSMDoR  | CGATACCCGGGGATAATGAATCATTTACTCTTGC                          | SmaI             |
| ApraF   | GCATCGATATCATCAAGGCCCGATCCTTGGAGCCCTTG                      | EcoRV            |
| ApraR   | GCATCGATATCTCATGAGCTCAGCCAATCGACTGG                         | EcoRV            |
| CTssMF2 | ATATGGATCCATGCATACAATTTTAGGCTACTTGTGGCAG                    | BamHI            |
| CTssMR2 | ATATGGATCCTCATGGCTTAACCTCCCGCAGCAG                          | BamHI            |
| T6ChUp  | ATGCATGGGTCGATCCAAATAGCG                                    | -                |
| T6ChDo  | GTAACAACCCAATTAATACTTCGG                                    | -                |
| HcpF    | GAAAGATATATACGTTGAGTTTCG                                    | -                |
| HcpR    | CTGCGTAAGAAGCTGTATTATTAG                                    | -                |
| TssMF   | GCAAAGACGTCTACAACAGTTAGAC                                   | -                |
| TssMR   | TTGCTGATCATCACGTTTACGAAC                                    | -                |
| 16SF    | GTGAGTAATGCTTAGGAATCTG                                      | -                |
| 16SR    | CATACTCTAGCTCACCAGTATC                                      | -                |
