# Supplementary material for: Differential Role of the T6SS in Acinetobacter baumannii Virulence
Source: PubMed Central journal article supplement (PMC4581634; doi:10.1371/journal.pone.0138265), 2015-09-24
Supplement: pone.0138265.s008.pdf [file pone.0138265.s008.pdf]

**S3 Table. T6SS locus genes in *A. baumannii* strains under study.**

|                                         | DSM30011 |             | ATCC17978 |              |             | Ab242/244/825 |             |
|-----------------------------------------|----------|-------------|-----------|--------------|-------------|---------------|-------------|
| Protein Description                     | Locus    | Length (AA) | Locus     | Accession    | Length (AA) | Locus         | Length (AA) |
| Conserved hypothetical (Signal peptide) | 11700*   | 229         | A1S_1292  | YP_001084322 | 230         | Ab244_01      | 230         |
| TssB                                    | 11695    | 167         | A1S_1293  | YP_001084323 | 49          | <i>tssB</i>   | 167         |
|                                         |          |             | A1S_1294  | YP_001084324 | 79          |               |             |
| TssC                                    | 11690    | 493         | A1S_1295  | YP_001084325 | 443         | <i>tssC</i>   | 493         |
| TssD/Hcp                                | 11685    | 167         | A1S_1296  | YP_001084326 | 167         | <i>hcp</i>    | 167         |
| TssE                                    | 11680    | 158         | A1S_1297  | YP_001084327 | 158         | <i>tssE</i>   | 158         |
| TssF                                    | 11675    | 603         | A1S_1298  | YP_001084328 | 185         | <i>tssF</i>   | 603         |
|                                         |          |             | A1S_1299  | YP_001084329 | 231         |               |             |
| TssG                                    | 11670    | 332         | A1S_1300  | YP_001084330 | 298         | <i>tssG</i>   | 332         |
| Putative membrane protein               | 11665*   | 470         | A1S_1301  | YP_001084331 | 421         | Ab244_02      | 470         |
| TssM                                    | 11660    | 1274        | A1S_1302  | YP_001084332 | 1041        | <i>tssM</i>   | 1274        |
|                                         |          |             | A1S_1303  | YP_001084333 | 188         |               |             |
| TagF                                    | 11655    | 319         | A1S_1304  | YP_001084334 | 275         | <i>tagF</i>   | 319         |
| TagN                                    | 11650    | 255         | A1S_1305  | YP_001084335 | 209         | <i>tagN</i>   | 255         |
| PAAR domain containing-protein          | 11645    | 87          | A1S_1306  | YP_001084336 | 87          | Ab244_03      | 87          |
| TssH/ClpV domain                        | 11640    | 892         | A1S_1307  | YP_001084337 | 896         | <i>tssH</i>   | 896         |
| TssA                                    | 11635    | 364         | A1S_1308  | YP_001084338 | 273         | <i>tssA</i>   | 364         |
| TssK                                    | 11630    | 454         | A1S_1309  | YP_001084339 | 388         | <i>tssK</i>   | 454         |
| TssL                                    | 11625    | 268         | A1S_1310  | YP_001084340 | 268         | <i>tssL</i>   | 268         |
| Hypothetical protein                    | 11620*   | 200         | A1S_1311  | YP_001084341 | 85          | Ab244_04      | 200         |
| Putative D-Ala D-Ala Carboxypeptidase   | 11615*   | 317         | A1S_1312  | YP_001084342 | 127         | Ab244_05      | 317         |

\* genes detected only in species of the genus *Acinetobacter*
