# Supplementary material for: Differential Role of the T6SS in Acinetobacter baumannii Virulence
Source: PubMed Central journal article supplement (PMC4581634; doi:10.1371/journal.pone.0138265), 2015-09-24
Supplement: pone.0138265.s009.pdf [file pone.0138265.s009.pdf]

**S4 Table.** Putative VgrG proteins encoded by the *A. baumannii* strains under study.

| Strain    | VgrG protein (aa length) | Locus or GenBank accession number |
|-----------|--------------------------|-----------------------------------|
| DSM30011  | 932                      | KT334325                          |
|           | 875                      | KT334328                          |
|           | 1106                     | KT334326                          |
|           | 921                      | KT334327                          |
| ATCC17978 | 933                      | A1S_3364                          |
|           | 426 <sup>a</sup>         | A1S_1288                          |
|           | 395 <sup>b</sup>         | A1S_1289                          |
|           | 914*                     | A1S_0082                          |
|           | 921                      | A1S_0550                          |
| Ab244     | 788                      | AKR15126                          |
|           | 1104                     | AKR15129                          |
|           | 463 <sup>a</sup>         | AKR15122                          |
|           | 601 <sup>b</sup>         | AKR15123                          |
|           | 1064                     | AKR15127                          |

<sup>a</sup>Proteins encoding VgrG N-terminal domain only.

<sup>b</sup>Proteins encoding VgrG C-terminal domain only.

\*Annotated as a pseudogene .
